# Supplementary material
Source: publisher figshare collection journal article supplement (https://rs.figshare.com/ndownloader/files/36851432)
Supplement: Supplementary file 1 [file 36851432]

## Sheet: Sheet1
Table S3: Loadings and scores from robust principal components analysis of compositional data on the taxonomic diet proportions. Top two loadings for each PC are in bold.
Loadings
Variable	dietPC1	dietPC2	dietPC3	dietPC4
Perc_Mammals	0.278144	0.471396	0.374027	0.600438
Perc_Birds	0.261893	0.0696936	-0.852106	0.0216728
Perc_Reptiles	0.143962	-0.84643	0.213087	0.132006
Perc_Amphibians	-0.889446	0.0824241	-0.0310616	0.033571
Perc_Inverts	0.205447	0.222916	0.296054	-0.787688
Importance of components:
	dietPC1	dietPC2	dietPC3	dietPC4
Proportion of Variance	0.556164	0.262939	0.165398	0.0154989
Cumulative Proportion	0.556164	0.819103	0.984501	1
Scores
	dietPC1	dietPC2	dietPC3	dietPC4
Agkistrodon_contortrix	-1.3636	0.557194	0.968146	-3.43391
Atheris_squamigera	-0.442123	1.8444	-1.97641	0.14722
Bitis_arietans	-2.70434	0.910153	-0.527811	0.327327
Bitis_caudalis	-1.16311	-2.48221	-0.345129	-0.202273
Bitis_gabonica	1.17312	1.73267	-1.25054	0.103616
Bitis_nasicornis	-3.50416	2.523	-1.6602	0.0227995
Bothriechis_schlegelii	-3.85831	-1.54906	-2.09607	-0.487651
Bothrops_alternatus	0.897443	2.35229	1.23561	-0.0855574
Bothrops_asper	-3.00158	-0.573148	-0.428345	0.365267
Bothrops_atrox	-3.28858	-0.141186	0.127325	-1.22941
Bothrops_brazili	-3.12472	0.261274	2.76314	-3.15883
Bothrops_cotiara	0.897443	2.35229	1.23561	-0.0855574
Bothrops_fonsecai	0.897443	2.35229	1.23561	-0.0855574
Bothrops_insularis	-2.26671	-0.138085	-4.31707	-4.75996
Bothrops_itapetiningae	-2.82435	0.003451	1.1927	-2.62829
Bothrops_jararaca	-2.58623	1.82815	-0.844818	-1.42824
Bothrops_jararacussu	-3.2131	0.0759415	2.17211	-0.974294
Bothrops_leucurus	-2.67074	-0.98802	-0.180121	0.371361
Bothrops_matogrossensis	-4.39484	0.626938	1.78208	-1.2015
Bothrops_moojeni	-3.21971	-0.523752	-0.279351	-0.170718
Bothrops_neuwiedi	1.29858	-0.148905	1.83192	0.258878
Bothrops_pauloensis	-1.22051	0.754886	-0.0918882	-2.51691
Bothrops_pubescens	-2.31389	0.218515	-0.60093	-1.40598
Bothrops_taeniatus	-3.74682	-0.388786	-0.979047	0.133865
Calloselasma_rhodostoma	-2.80506	-1.46727	1.84638	0.316004
Causus_lichtensteinii	-6.88514	0.694977	-0.779087	-2.71459
Causus_resimus	-6.88514	0.694977	-0.779087	-2.71459
Causus_rhombeatus	-6.88514	0.694977	-0.779087	-2.71459
Cerastes_vipera	0.370525	-4.62859	0.635909	-2.22112
Cerrophidion_godmani	-1.22902	0.479711	1.26277	-4.19011
Cerrophidion_sasai	0.614669	-0.212194	0.979668	-3.1331
Crotalus_adamanteus	1.55699	2.51553	-0.949857	-0.048822
Crotalus_aquilus	2.53312	-0.794655	-0.284089	-0.855201
Crotalus_atrox	2.1185	-0.037779	-0.866495	0.296185
Crotalus_catalinensis	1.43026	-1.50283	2.03719	0.284581
Crotalus_cerastes	1.98983	-2.02682	0.0553453	0.15156
Crotalus_durissus	1.02261	1.60524	1.42107	0.0273834
Crotalus_enyo	2.01621	-1.06611	2.88684	-2.11388
Crotalus_horridus	0.564663	1.74269	-1.48736	0.131697
Crotalus_intermedius	0.370525	-4.62859	0.635909	-2.22112
Crotalus_lepidus	2.50564	-1.57606	1.50698	-4.19081
Crotalus_mitchellii	2.26463	-1.78754	-0.871558	0.18966
Crotalus_oreganus	1.41024	-0.173155	0.770911	-0.0190207
Crotalus_polystictus	2.39971	0.153184	-0.448956	-0.745695
Crotalus_pricei	1.92336	-2.69934	-0.485128	-0.267376
Crotalus_ravus	-4.60793	-0.496964	1.45687	0.0728725
Crotalus_ruber	1.63099	-0.140947	0.791161	0.288858
Crotalus_scutulatus	1.97462	-0.428352	2.81668	-1.97953
Crotalus_tigris	2.23212	-1.62566	-0.691002	0.245933
Crotalus_triseriatus	-0.619072	-0.434462	2.13191	-4.16633
Crotalus_viridis	1.83101	1.63768	-1.15582	0.0842923
Crotalus_willardi	3.06061	-1.25733	-0.474246	-3.32616
Echis_carinatus	-0.919741	0.703603	1.70126	-4.76086
Echis_coloratus	-3.08261	0.207187	2.65049	-2.4754
Echis_ocellatus	2.14193	0.851705	3.06197	-4.08587
Echis_pyramidum	-1.46616	1.4567	2.77263	-4.53952
Lachesis_muta	0.897443	2.35229	1.23561	-0.0855574
Ophryacus_undulatus	1.37356	-0.740682	1.9456	0.302885
Ovophis_okinavensis	-6.19091	0.207993	-1.78584	-2.2989
Porthidium_yucatanicum	2.13241	-2.43229	-0.929102	-0.119828
Protobothrops_mucrosquamatus	-2.85407	0.184301	-0.583808	0.37834
Sistrurus_catenatus	1.25914	-0.653743	1.5619	-1.59705
Sistrurus_miliarius	-3.49437	-1.08149	2.53879	-3.54661
Trimeresurus_stejnegeri	-5.90032	-1.29901	0.463287	-1.39833
Vipera_ammodytes	2.34719	-1.51738	-1.14114	0.238569
Vipera_aspis	-0.669613	-0.519016	1.50252	0.387598
Vipera_berus	2.10544	0.424578	-1.15387	0.243403
Vipera_latastei	-0.467463	-0.142326	-0.00229428	-1.13704
Vipera_ursinii	2.05595	0.22292	1.09255	-5.97718
